# Supplementary material for: Plasticity, Pleiotropy and Fitness Tradeoffs in Arabidopsis Genotypes with Different Telomere Lengths
Source: Research Square preprint supplement (doi:10.21203/rs.3.rs-505927/v1), 2021-05-20
Supplement: Supplementary file 2 [file 68680a182674eb3c990ea292.xlsx]

## Sheet: Collected Raw Data
PotID	Experiment	Genotype	Background	Transgenic	Water	Temperature	Treatment	To_5R	Tf_5R	Tf_To_5R	To_1L	Tf_1L	Tf_To_1L	To_2R	Tf_2R	Tf_To_2R	Tf_To_all	FlowerDay	PrmBolts	SecBolts	Height	BoltThickness	Leaves	LeafThickness	TotalSeeds	DryWeight	StomArea	StomDensity	StomArea_PerArea	EP_Area	SI	Stom_EP_Ratio	RWC	OP	TotChl	Proline
2	telo	Col-0	Col-0	WT	mod	22C	mod|22C	2257	1663	-594	2249	2820	571	3734.1	3954.4	220.3	65.7667	31	5	3	291	101	13	55	3581.33	149.7	337.3	0.0812065	27.3909	152.175	24.1379	0.705258			8.03822	2.06962
6	telo	Col-0	Col-0	WT	wet	22C	wet|22C											31	1	3	350	95	11	55	3322	149.86								249	9.55407	1.22976
10	telo	Col-0	Col-0	WT	wet	22C	wet|22C	2336	2404	68	2230	2430	200	3580	2984	-596	-109.333	31	1	3	280	110	9	55	2640	127.92							0.918227	285	11.908	0.507326
13	telo	Col-0	Col-0	WT	mod	22C	mod|22C	2476	2391	-85	2610	2720	110	5003	4964	-39	-4.66667	30	5	1	306	93	8	51	2986.67	121.16
17	telo	Col-0	Col-0	WT	wet	22C	wet|22C	2853	2453	-400	2689	2645	-44	3587.4	3587	-0.4	-148.133	31	2	2	233	94	6	55	2585	96.12	215.546	0.25522	55.0117	95.495	31.8841	1.05654		305
20	telo	Col-0	Col-0	WT	wet	22C	wet|22C	2533	2543	10	3033	2686	-347	3643			-168.5	31	1	3	252	86	12	49	1992.33	117.26							0.917275	274	8.38389	0.811939
24	telo	Col-0	Col-0	WT	mod	22C	mod|22C	2504	1636	-868							-868	31	5	3	294	88	10	57	3174	113.66	344.101	0.150812	51.8946	122.514	23.2143	0.849132	0.905473		8.69747	3.51564
25	telo	Col-0	Col-0	WT	mod	22C	mod|22C											30	2	4	267	89	10	48	2625	90.73	344.532	0.104408	35.972	151.735	22.5	0.659211	0.946071		6.99397	2.62993
38	telo	Col-0	Col-0	WT	wet	22C	wet|22C											31	1	2	230	75	10	46	987	59.33	149.602	0.37123	55.5368	35.486	31.068	1.90008	0.908437		9.27412	1.5155
57	telo	Col-0	Col-0	WT	wet	22C	wet|22C	2233.25	2420.25	186.996		3255.4		3642.94	3279.61	-363.331	-88.1671	31	2	4	460	101	101	40	4278.33	193.73	245.541	0.359629	88.3038	46.891	38.75	3.31284	0.915782		12.2385	1.66555
60	telo	Col-0	Col-0	WT	mod	22C	mod|22C											30	4	2	289	93	12	55	3824.33	134.37	261.612	0.139211	36.4194	169.404	25	0.51477	0.86289		8.93726	3.67527
69	telo	Col-0	Col-0	WT	mod	22C	mod|22C	2369	2736	367	2533	2421	-112	4278	3753	-525	-90	30	3	3	294	83	9	47	3366	143.13							0.913386		5.91526	3.64273
91	telo	Col-0	Col-0	WT	wet	30C	wet|30C											30	5	9	409	82	10	49	795	114.01	232.583	0.162413	37.7745	110.277	27.451	0.798031	0.935005		3.2181
93	telo	Col-0	Col-0	WT	wet	30C	wet|30C	2479	2396	-83	3014	3001	-13	3355	4202	847	250.333	29	4	9	358	74	11	46	72	78.92	293.288	0.116009	34.0241	156.091	21.7391	0.521932	0.928717	286	7.93239
99	telo	Col-0	Col-0	WT	wet	30C	wet|30C	2359	2707	348	2367	2991	624				486	29	6	14	493	88	13	53	929.333	170.03							0.948357	285	6.87805
105	telo	Col-0	Col-0	WT	wet	30C	wet|30C				1242.78	1343.99	101.206				101.206	29	6	11	455	77	10	49	441	149.12							0.95255	276	4.34345
114	telo	Col-0	Col-0	WT	wet	30C	wet|30C											29	6	14	420	74	9	53	736	144.12	358.64	0.116009	41.6055	135.582	20	0.661296	0.924258	296	2.46192
126	telo	Col-0	Col-0	WT	wet	30C	wet|30C	2915	2108	-807				2960.94	3027.06	66.1145	-370.443	29	5	13	425	84	10	41	606.667	156.21	429.138	0.116009	49.7839	96.229	23.2558	1.35138	0.943482		9.69695	2.1001
1	telo	ku70	Col-0	TG	mod	22C	mod|22C	2629	2180	-449	6594	4638	-1956				-1202.5	34	1	0	178	91	10	42	494.667	43.77	302.491	0.0928074	28.0734	99.9	25	1.00931	0.923442	316	8.8298	2.45873
27	telo	ku70	Col-0	TG	wet	22C	wet|22C				4065	5656	1591	4672.6	3171.42	-1501.19	44.9067	36	1	2	231	82	2	52	896	69.18	154.325	0.174014	26.8548	68.525	36.5854	1.29929	0.899807	324	10.9832	2.26353
28	telo	ku70	Col-0	TG	wet	22C	wet|22C	2961	2768	-193	3879.4	2803	-1076.4	3422.3	4844.8	1422.5	51.0333	37	1	0	293	91	16	47	1140.67	87				0	0	0	0.880364	319	9.52515
29	telo	ku70	Col-0	TG	mod	22C	mod|22C	2723	2527	-196	5371	5360	-11	7114	5158	-1956	-721	37	1	1	325	86	16	45	2090.67	131.67	181.146	0.278422	50.4351				0.901625	359	6.60017	3.74814
30	telo	ku70	Col-0	TG	wet	22C	wet|22C	2374	1905	-469	6572	5702	-870	4174.1	4403	228.9	-370.033	34	1	0	285	88	13	51	1500	113.9	276.758	0.116009	32.1066				0.913253	321	8.33255	1.36743
31	telo	ku70	Col-0	TG	mod	22C	mod|22C											34	1	4	350	85	23	38	2332	179.94	285.751	0.197216	56.3545	163.678	39.5349	1.14149	0.854369	327	5.78854	1.49557
39	telo	ku70	Col-0	TG	wet	22C	wet|22C	1884	2413.1	529.1	1364.5	1666	301.5	2951	2624	-327	167.867	31	1	3	308	117	14	47	2772	167.38	300.67	0.116009	34.8806					302
46	telo	ku70	Col-0	TG	wet	22C	wet|22C	2326	2431	105				7456	7402	-54	105	37	1	3	300	93	13	47	1877.67	106.72				46.744	38.0435	2.89105		340	8.84744	2.98746
51	telo	ku70	Col-0	TG	mod	22C	mod|22C											36	1	4	366	108	18	52	3525	186.95				99.998	37.7049	1.65537		307
54	telo	ku70	Col-0	TG	wet	22C	wet|22C											37	1	0	250	85	12	53	704	83.5				70.141	32.8358	2.35021	0.907348		11.1203	1.46342
70	telo	ku70	Col-0	TG	mod	22C	mod|22C	3530.3	2654.3	-876	2914	3141	227	3727.3	2851.3	-876	-508.333	31	4	5	335	112	12	62	3520	215.24				118.549	35.8491	1.49187			8.7536	5.96984
77	telo	ku70	Col-0	TG	mod	22C	mod|22C											35	1	1	60	81	14	47	918	74.43	343.803	0.174014	59.8265	106.459	31.25	1.46793	0.87907	319	3.81881	5.29997
89	telo	ku70	Col-0	TG	wet	30C	wet|30C											30	7	11	330	84	18	45	1422	137.35
97	telo	ku70	Col-0	TG	wet	30C	wet|30C	2502	2505	3	3713	3112	-601	3025	3034	9	-196.333	35	2	5	458	94	10	47	1333	113.81	390.643	0.0928074	36.2546	136.659	27.5862	1.08896	0.866545	273	5.10477
100	telo	ku70	Col-0	TG	wet	30C	wet|30C	3438	4062	624	1163	1032	-131	2661	1500	-1161	-222.667	32	3	5	400	108	14	33	1888.33	131.06									4.10146
101	telo	ku70	Col-0	TG	wet	30C	wet|30C											34	4	6	385	105	13	38	2052	183.07							0.935135		5.46306	3.59846
115	telo	ku70	Col-0	TG	wet	30C	wet|30C											33	3	6	375	115	12	58	2968.67	184.89								281	6.86976	7.5864
124	telo	ku70	Col-0	TG	wet	30C	wet|30C	4074	3563	-511	2500	2510	10	7534	7283	-251	-250.5	30	2	5	310	88	7	41	996.667	71.46							0.902616	314	5.35879
4	telo	nop2a	Col-0	TG	wet	22C	wet|22C				2330	2230	-100				-100	31	1	4	315	92	11	53	1964.33	172.43	106.563	0.406032	43.268	84.188	32.7103	0.615306	0.902439	286	7.53615	1.47643
9	telo	nop2a	Col-0	TG	wet	22C	wet|22C	1747	1775	28	2183	2132	-51	3343.6	2755.7	-587.9	-203.633	31	1	2	353	86	13	51	2223	141.69									9.88928	0.548265
32	telo	nop2a	Col-0	TG	wet	22C	wet|22C	2633	2153	-480	1981	1950	-31	3025.3	2786.8	-238.5	-249.833	31	1	4	312	85	10	54	2379.67	138.78				117.178	27.027	1.32725	0.910427	275	6.85041	0.892565
37	telo	nop2a	Col-0	TG	mod	22C	mod|22C	2407	2223	-184	2090	2210	120	2823	2951	128	21.3333	31	3	3	210	81	12	40	1547	69.65	406.484	0.139211	56.587	102.984	29.2683	1.63326	0.915412		7.04451	8.44294
64	telo	nop2a	Col-0	TG	mod	22C	mod|22C											31	2		331	94	9	52	5587	234.97							0.901961		6.15587	2.41793
66	telo	nop2a	Col-0	TG	mod	22C	mod|22C	2179	2043	-136	2267	2554	287	2826	3334	508	219.667	31	5	2	318	109	12	55	4602	176.51	388.159	0.220418	85.5572	104.893	39.5833	2.42448	0.858553	295	6.50155	7.02988
72	telo	nop2a	Col-0	TG	wet	22C	wet|22C	2843	2159	-684	2312	2227	-85	3406.3	3081.6	-324.7	-364.567	31	2	3	247	75	10	50	2480.67	127.72							0.880174	290	9.55484	0.666768
73	telo	nop2a	Col-0	TG	wet	22C	wet|22C											31	1	3	305	80	11	50	2242	131.8	258.441	0.382831	98.9393	82.671	43.4211	2.39913	0.891626	308	8.61565	2.62673
74	telo	nop2a	Col-0	TG	wet	22C	wet|22C	2481	2353	-128	2020	2240	220	2948	2774	-174	-27.3333	31	1	2	284	73	11	39	150.667	98.19	234.419	0.290023	67.9869				0.894128	296	8.20582	0.0564578
78	telo	nop2a	Col-0	TG	mod	22C	mod|22C	3183	2893	-290	2610	2450	-160				-225	31	1	2	266	74	11	28	2080	100	255.905	0.174014	44.531	121.681	37.5	1.26185	0.913174	313	6.57371	11.3944
82	telo	nop2a	Col-0	TG	mod	22C	mod|22C	1806	2384	578	1506	1439	-67	3557			255.5	31	1	2	253	71	10	43	1848	89.88	290.199	0.208817	60.5984	134.114	34.6154	1.14555	0.925477	312	6.08529	6.10375
83	telo	nop2a	Col-0	TG	mod	22C	mod|22C	2223	1833	-390	1820	1930	110				-140	31	2	2	259	78	13	48	1817.33	99.53	255.566	0.220418	56.3313	50.464	27.1429	1.88671	0.88978	350	6.48069	8.08561
90	telo	nop2a	Col-0	TG	wet	30C	wet|30C	1853	1953	100	1531	1379	-152	2969	2652	-317	-123	30	6	12	401	82	12	50	599.333	146.58							0.899459		9.73131
102	telo	nop2a	Col-0	TG	wet	30C	wet|30C	2086.23	2055.34	-30.8838	2421	2019	-402	2741.25	3031.01	289.76	-47.7079	31	6	16	431	86	12	50	554.667	194.39	241.113	0.174014	41.9569	91.726	27.7778	1.01101	0.926082		4.17742
108	telo	nop2a	Col-0	TG	wet	30C	wet|30C											31	6	17	460	76	10	42	0	147.18								287	5.1631	7.00245
111	telo	nop2a	Col-0	TG	wet	30C	wet|30C											31	7	17	404	95	19	42	783	214.62	364.297	0.139211	50.7142	78.021	23.5294	1.43668	0.947454	252	1.84598
119	telo	nop2a	Col-0	TG	wet	30C	wet|30C	1782	1632	-150	2240	2220	-20	3131	3236	105	-21.6667	29	6	12	413	88	10	54	455	137.16	439.978	0.12761	56.1457					252	5.89693
122	telo	nop2a	Col-0	TG	wet	30C	wet|30C	1919	1627	-292	2300	2330	30	3851			-131	31	6	17	422	74	8	43	108.333	141.94	338.325	0.0812065	27.4742	85.657	21.875	1.10593	0.931833	278	7.55069
7	telo	tad3-2	Col-0	TG	wet	22C	wet|22C	3507	1745	-1762	2896	2870	-26	3490	3400.1	-89.9	-625.967	34	1	2	267	76	12	44	1512	90.18	330.205	0.163551	54.0054	103.767	32.5581	1.53622		279	9.45782	1.50612
8	telo	tad3-2	Col-0	TG	mod	22C	mod|22C											31	2	3	250	91	13	66	2123.33	106.45				77.58	41.3043	2.13463	0.92356	293	4.92157	1.34347
16	telo	tad3-2	Col-0	TG	mod	22C	mod|22C	3323	2933	-390	2720	2370	-350				-370	31	1	2	242	78	11	50	901.333	52.08	219.345	0.268692	58.936	86.489	28.3951	1.00569	0.941385	289	7.01644	1.92486
33	telo	tad3-2	Col-0	TG	mod	22C	mod|22C	2926	3253	327	3312	2990	-322	3432	3616	184	63	31	4	2	325	94	12	46	2765.33	159.65	292.939	0.198598	58.1772	91.09	32.0755	1.51863	0.915709	339	5.54713	1.13076
34	telo	tad3-2	Col-0	TG	wet	22C	wet|22C											32	1	3	283	88	12	48	2188.67	111.51				105.04	39.4737	1.7158	0.909287	285	10.9175	0.741349
44	telo	tad3-2	Col-0	TG	mod	22C	mod|22C											34	2	3	250	75	10	45	1831.33	15.39	255.185	0.198598	50.6793				0.894047	299	9.09044	4.69594
56	telo	tad3-2	Col-0	TG	wet	22C	wet|22C	2553	2923	370	2999	2934	-65				152.5	32	1	3	300	80	12	45	1893.33	129.5							0.939351	291	12.9081	2.83608
58	telo	tad3-2	Col-0	TG	wet	22C	wet|22C	3164.81	2942.28	-222.534	3392	2549	-843	3722.58	3713.27	-9.30738	-358.28	22	1	3	300	93	11	50	2964	143.52							0.893366	281	9.46259	2.90978
61	telo	tad3-2	Col-0	TG	wet	22C	wet|22C				1984	1930	-54	3753	4861	1108	527	32	1	4	340	97	13	51	3796	132.71	346.965	0.116822	40.5333	146.253	32.2581	1.1297		277	8.66619	1.25036
62	telo	tad3-2	Col-0	TG	mod	22C	mod|22C	3778	3530	-248				3378	3252	-126	-187	31	3	3	268	78	10	47	1691.33	90.62	282.287	0.292056	82.4437	79.391	40.3226	2.40247	0.937589	310	5.30894	2.58976
65	telo	tad3-2	Col-0	TG	mod	22C	mod|22C	2521	3507	986	2770	2749	-21	4460	4888	428	464.333	31	6	4	314	88	13	46	2698	133.74	328.89	0.21028	69.1591	63.337	30	2.22544	0.872505	297	6.48871	6.08988
80	telo	tad3-2	Col-0	TG	wet	22C	wet|22C	3663	3553	-110	3430	3160	-270				-190	32	1	3	260	83	10	52	1899.67	95.17	308.863	0.128505	39.6904				0.906129	275	9.19874	6.46465
94	telo	tad3-2	Col-0	TG	wet	30C	wet|30C											30	5	11	491	88	12	56	704	198.86							0.921505	265	4.2126
98	telo	tad3-2	Col-0	TG	wet	30C	wet|30C	2864	2776	-88	3319	2455	-864		4431		-476	31	8	12	510	76	10	33	0	159.29	275.476	0.0934579	25.7454	113.018	25	0.812484			2.6819	6.04066
106	telo	tad3-2	Col-0	TG	wet	30C	wet|30C				1345.71	2312.01	966.304				966.304	30	5	17	475	90	10	56	1484.33	193.45								284	4.86635	2.9783
107	telo	tad3-2	Col-0	TG	wet	30C	wet|30C	2558	2649	91	1055.56	1387.49	331.928				211.464	31	6	11	396	85	10	38	346.667	134.88	263.375	0.0934579	24.6145	112.137	25	0.782895	0.912331
121	telo	tad3-2	Col-0	TG	wet	30C	wet|30C	1253	1933	680	1900	1820	-80	3717	3104	-613	-4.33333	30	5	13	478	55	11		869	181.83	262.125	0.116822	30.622					260	3.58794
123	telo	tad3-2	Col-0	TG	wet	30C	wet|30C	2608.16	3108.92	500.762	2834	2280	-554	3487.3	3645.86	158.562	35.1082	31	6	9	461	71	8	41	799	71.46	334.489	0.0817757	27.3531	86.44	19.4444	0.934044	0.92313	282	6.94997
3	telo	tert	Col-0	TG	wet	22C	wet|22C	1553	1505	-48	1194	1110	-84	3065	1641	-1424	-518.667	31	3	2	303	87	12	57	4792.67	212.26	278.668	0.232019	64.6561				0.871629	268	10.5582	0.341225
5	telo	tert	Col-0	TG	mod	22C	mod|22C	1523	1573	50							50	31	1	3	147	96	12	60	2378	117.01				166.712	35.6322	0.717467	0.906151	272	6.68681	1.74792
11	telo	tert	Col-0	TG	mod	22C	mod|22C	1553	1583	30	1460	1130	-330				-150	31	4	2	225	90	9	50	1319.67	136.61	264.689	0.220418	58.342	118.304	38	1.37128	0.882514		9.24202	5.66169
23	telo	tert	Col-0	TG	mod	22C	mod|22C	1516	1590	74	1392	1032	-360	2882	2972	90	-65.3333	31	2	3	163	94	10	48	1943.33	123.06	355.564	0.290023	103.122				0.896282		5.82223	4.57776
26	telo	tert	Col-0	TG	wet	22C	wet|22C	918	976	58	1136	923	-213	2686	2752	66	-29.6667	34	1	3	289	98	12	52	4823	146.42	244.641	0.290023	70.9514	51.492	31.6456	2.19956		287	9.50749	1.62268
35	telo	tert	Col-0	TG	mod	22C	mod|22C	1434	1050	-384	1220	1430	210				-87	31	4	3	305	106	11	55	2784	176.59	324.609	0.278422	90.3784						5.39238	1.18784
41	telo	tert	Col-0	TG	wet	22C	wet|22C	1843	1813	-30	1530	1370	-160	2888.1	2638	-250.1	-146.7	31	1	2	312	81	0	51	1280	82.74							0.875547		10.3913	1.19944
42	telo	tert	Col-0	TG	mod	22C	mod|22C											31	1	2	295	85	13	39	1390	72.1				211.058	32	0.82376	0.896907	285	6.02194	2.22299
52	telo	tert	Col-0	TG	wet	22C	wet|22C	1873	1915	42	1423	1230	-193	2731.3	2585.1	-146.2	-99.0667	31	3	3	165	99	11	45	3833.33	145.82				64.659	32.6531	2.63888		259		0.686295
59	telo	tert	Col-0	TG	wet	22C	wet|22C	1753	1753	0	1114	1122	8	2796.1	2423.8	-372.3	-121.433	30	4	5	323	105	10	52	5004	222.94							0.8354	241	9.19554	2.57543
68	telo	tert	Col-0	TG	wet	22C	wet|22C	1440	1516	76	1074	1334	260	2792.9	2389.3	-403.6	-22.5333	37	1	4	331	85	12	52	2224	143.88	257.587	0.25522	65.7414	87.566	41.5094	2.08761	0.896007	244	9.18829	4.09991
71	telo	tert	Col-0	TG	mod	22C	mod|22C											31	5	3	304	88	10	68	2070	115.87	234.239	0.278422	65.2173				0.938956	320	7.18807	2.58375
85	telo	tert	Col-0	TG	wet	30C	wet|30C											30	8	11	346	82	17	42	0	125.52									4.90634	4.59364
88	telo	tert	Col-0	TG	wet	30C	wet|30C											29	7	14	333	80	15	46	0	141.9	313.872	0.139211	43.6945	81.643	28.5714	1.53778			5.70594
95	telo	tert	Col-0	TG	wet	30C	wet|30C	1450.9	1390.29	-60.6086	1270	1125	-145	2493.28	2539.72	46.434	-53.0582	31	3	6	234	86	10	39	1350	88	300.805	0.162413	48.8546	74.888	27.451	1.51984	0.903681		6.38043	2.10383
96	telo	tert	Col-0	TG	wet	30C	wet|30C	1493.14	1376.57	-116.575	1420	1147.2	-272.8	2660.73	2579.1	-81.6328	-157.003	29	6	11	385	93	14	55	1194.67	121.65	261.307	0.174014	45.471	91.824	33.3333	1.42287	0.898792		8.5748
110	telo	tert	Col-0	TG	wet	30C	wet|30C	2391	1707	-684	1200	1242	42	2321	1926	-395	-345.667	31	5	10	400	77	10	45	0	96.95	294.113	0.185615	54.5918	0	30.1887	0	0.929	250	4.51025	1.27811
113	telo	tert	Col-0	TG	wet	30C	wet|30C	1913	1813	-100	1510	1460	-50	2951	2507	-444	-198	33	3	9	270	105	13	38	0	186.67	199.273	0.174014	34.6764	60.694	31.25	1.49239

## Sheet: Seed Germination Data
Sample	Genotype	Treatment	Seed Number	Seedlings	germination percentage
29	Ku	dry|22c	110	90	81.8182
40	Ku	dry|22c	115	109	94.7826
1	Ku	dry|22c	88	67	76.1364
54	Ku	wet|22c	86	67	77.907
46	Ku	wet|22c	103	90	87.3786
39	Ku	wet|22c	79	68	86.0759
33	ter2-2	dry|22c	142	103	72.5352
65	ter2-2	dry|22c	132	117	88.6364
44	ter2-2	dry|22c	104	86	82.6923
8	ter2-2	wet|22c	111	81	72.973
80	ter2-2	wet|22c	95	77	81.0526
7	ter2-2	wet|22c	120	100	83.3333
37	oli2	dry|22c	96	88	91.6667
64	oli2	dry|22c	135	125	92.5926
83	oli2	dry|22c	100	76	76
9	oli2	wet|22c	119	95	79.8319
32	oli2	wet|22c	105	89	84.7619
4	oli2	wet|22c	104	87	83.6538
11	tert	dry|22c	89	87	97.7528
23	tert	dry|22c	67	100	149.254
71	tert	dry|22c	88	73	82.9545
52	tert	wet|22c	82	82	100
3	tert	wet|22c	125	114	91.2
59	tert	wet|22c	124	93	75
24	col-0	dry|22c	118	93	78.8136
2	col-0	dry|22c	120	93	77.5
13	col-0	dry|22c	136	127	93.3824
6	col-0	wet|22c	123	123	100
10	col-0	wet|22c	141	127	90.0709
171	col-0	wet|22c	102	86	84.3137
